# Supplementary material for: Transformations of supported gold nanoparticles observed by in situ electron microscopy
Source: Royal Society of Chemistry journal article supplement (doi:10.1039/c9nr02731a), 2019-01-01
Supplement: c9nr02731a2.pdf [file c9nr02731a2.pdf]

## Nano Scale

### ARTICLE

#### Supplementary Online Information

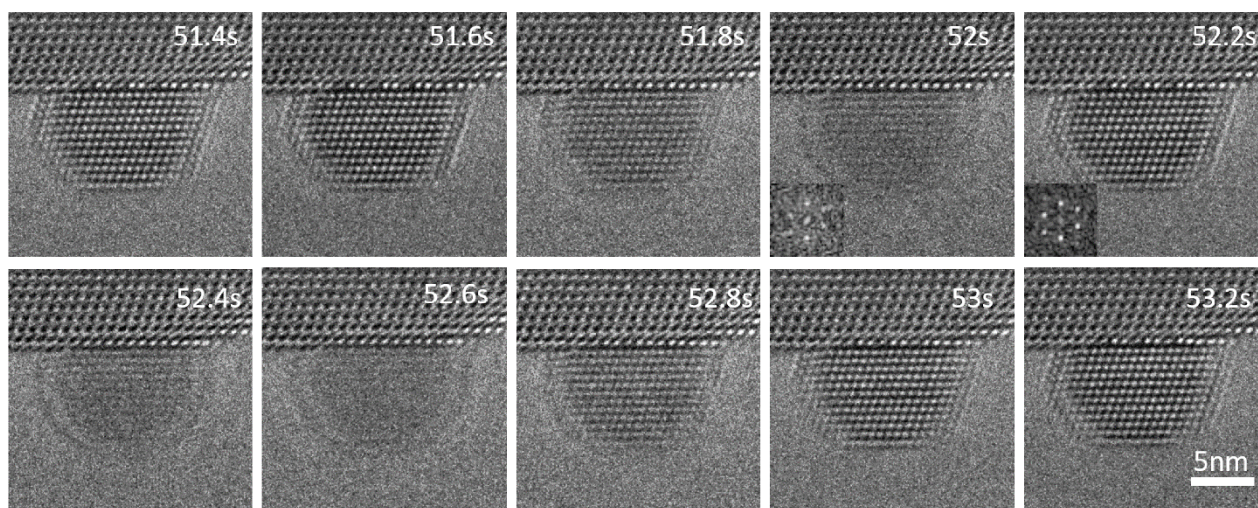

S 1 Image sequence of a Au nanoparticle at 973K in 4.5 Pa under 4.5 Pa O<sub>2</sub>

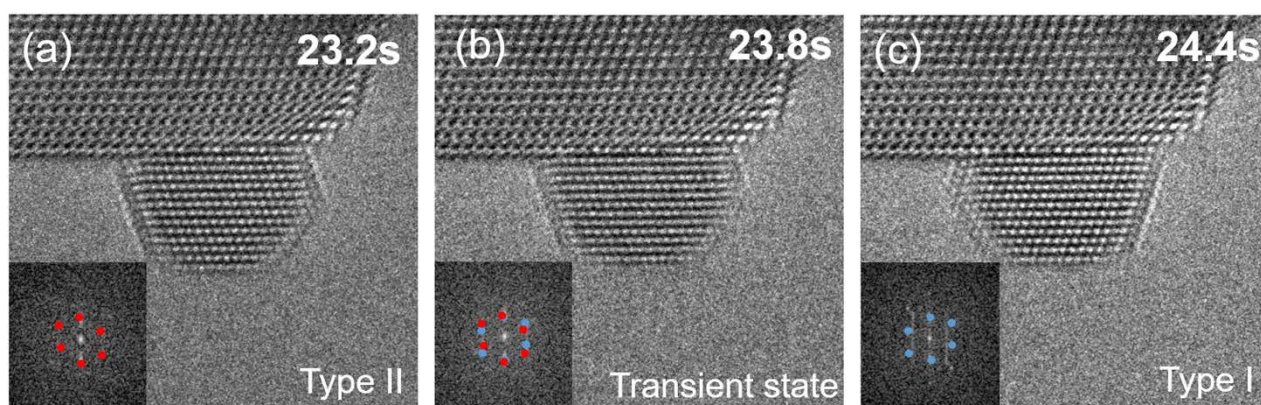

S 2 Morphology evolution of an Au nanoparticle at 973K in 4.5 Pa O<sub>2</sub>. a) Nanoparticle is in Type II, b) time-averaged overlapped state between Type I and Type II, c) nanoparticle in Type I. Observation time and FFT of the nanoparticle is shown on each frame.

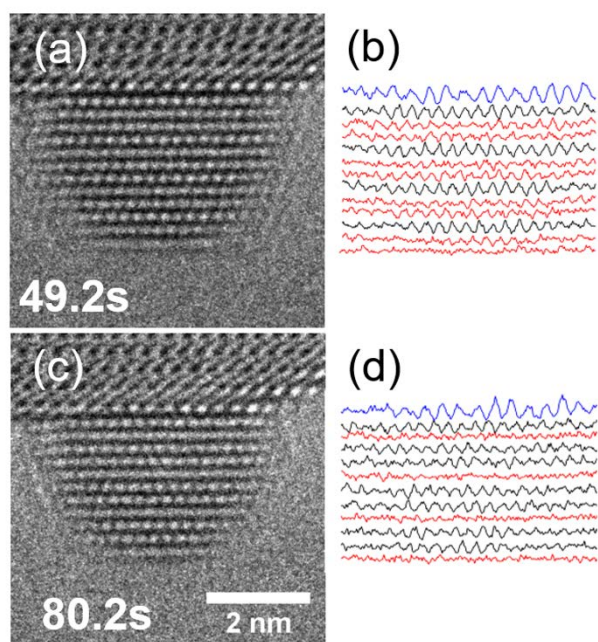

S 3 Profile intensity of each layer of the nanoparticle of transient states

Table 1 Average residence time of each state

|                 | Average residence time (s) | Standard deviation |
|-----------------|----------------------------|--------------------|
| Type I          | 2.53                       | 2.68               |
| Type II         | 0.73                       | 0.87               |
| Non-crystalline | 1.09                       | 0.96               |
